# Supplementary material for: Urinary Amine and Organic Acid Metabolites Evaluated as Markers for Childhood Aggression: The ACTION Biomarker Study
Source: Front Psychiatry. 2020 Mar 31;11:165. doi: 10.3389/fpsyt.2020.00165 (PMC7138132; doi:10.3389/fpsyt.2020.00165)
Supplement: Supplementary file 1 [file Data_Sheet_1.xlsx]

## Sheet: Table S1
Supplementary Table 1. Decriptives for all twin pairs with urine (N = 1,362) and/or DNA (N = 1,468).
	Concordant Low	Discordant		Concordant High
		Low	High
		(n = 196)	(n =196)
N (N complete twin pairs)	676 (337)	392 (196)		406 (203)
Mean (SD) age sample collection	9.4 (1.9)	10.1 (1.7)		9.5 (1.8)
Range age sample collection	5.6 - 12.6	6.1 - 12.7		5.8 - 12.9
N (%) females	354 (52.4%)	88 (44.9.6%)	82 (41.8%)	177 (43.6%)
N (%) MZ twins	540 (79.9%)	160 (81.6%)	160 (81.6%)	370 (91.1%)
Mean CBCL (SD) aggression score	2.7 (3.8)	4.5 (4.4)	6.3 (5.8)	7.5 (6.0)

## Sheet: Table S2
Supplementary Table 2. Primary DSM-IV classification of the clinical cases (N = 183)
DSM classification	N (% of total sample)
ADHD combined type	45 (24.6%)
Pervasive developmental disorder not otherwise specified	40 (21.9%)
Autistic disorder	33 (18.0%)
ADHD inattentive type	13 (7.1%)
Learning disorder not otherwise specified	12 (6.6%)
Adjustment disorder	9 (4.9%)
Generalized anxiety disorder	3 (1.6%)
Obsessive compulsive disorder	2 (1.1%)
Undifferentiated somatoform Disorder	2 (1.1%)
Separation anxiety disorder	2 (1.1%)
Posttraumatic stress disorder	2 (1.1%)
Reactive attachment disorder	2 (1.1%)
Other	14 (7.7%)
Total classifications	179
Note. Not all clinical cases have received classifications because data were collected before the diagnostic process was ended. Classifications with a prevalence smaller than two have been grouped under “Other”. ADHD = Attention Deficit Hyperactivity Disorder; DSM = Diagnostic and Statistical Manual of Mental Disorders.

## Sheet: Table S3
Supplementary Table 3. Linear regression results for all amines, organic acids and other biomarkers before and after normalization. These linear regression were performed in the sample of children with low aggression scores (N = 804). All p-values ≤ 0.05 have been given in bold, the p-values for aggression have been adjusted for multiple testing using the FDR of 5% for 89 tests. In addition this …
Platform	Metabolite	Qced values					Normalized values					RSDqc	N imputed
		alpha	beta	SE(beta)	p.value	FDR p.value	alpha	beta	SE(beta)	p.value	FDR p.value
Amines	1.Methylhistidine	24.83	0.86	0.04	2.5e-73	9.61e-73	1.61	0	0	1.91e-09	1.06e-08	0.087	186
Amines	3.Methoxytyramine	14.67	0.92	0.05	2.39e-64	5.92e-64	1.31	0	0	0.00233	0.00483	0.126	0
Amines	3.Methoxytyrosine	13.2	0.92	0.04	2.25e-77	1.06e-76	1.29	0	0	0.00146	0.00341	0.095	0
Amines	3.Methylhistidine	61.65	1.79	0.35	4.04e-07	4.13e-07	1.09	0	0	0.458	0.537	0.1	0
Amines	5.Hydroxy.L.tryptophan	-1.01	1.08	0.05	7.21e-95	8.02e-94	0.99	0	0	0.833	0.862	0.134	0
Amines	ADMA	14.99	0.89	0.04	3.55e-79	1.75e-78	1.3	0	0	0.00192	0.00417	0.108	0
Amines	Anserine	55.78	4.04	0.93	1.45e-05	1.47e-05	0.65	0	0	0.0803	0.113	0.094	0
Amines	Beta.Alanine	66.72	0.74	0.13	3.23e-08	3.34e-08	2.65	-0.01	0	1.19e-08	5.88e-08	0.087	0
Amines	Citrulline	5.13	1.14	0.09	2.47e-36	3.1e-36	1.15	0	0	0.00182	0.00405	0.119	0
Amines	Cystathionine	12.3	1.18	0.11	1.91e-25	2.2e-25	1.01	0	0	0.567	0.631	0.1	0
Amines	Cysteine	36.17	0.69	0.04	1.62e-65	4.11e-65	2.11	-0.01	0	5.55e-25	8.24e-24	0.091	0
Amines	DL.3.aminoisobutyric.acid	55.18	0.79	0.13	7.11e-10	7.44e-10	2.02	0	0	0.00328	0.00634	0.086	0
Amines	Epinephrine	33.54	0.78	0.07	7.47e-27	8.86e-27	1.99	-0.01	0	8.51e-09	4.45e-08	0.187	0
Amines	Ethanolamine	33.89	0.67	0.03	2.59e-73	9.61e-73	2.08	-0.01	0	1.86e-29	3.31e-28	0.098	0
Amines	Gamma.aminobutyric.acid	31.59	0.72	0.04	5.12e-56	9.5e-56	1.92	0	0	2.8e-14	1.92e-13	0.107	0
Amines	Gamma.Glutamylglutamine	470.5	0.56	1.13	0.621	0.621	11.37	-0.04	0.02	0.0137	0.0243	0.139	1278
Amines	Gamma.L.glutamyl.L.alanine	4.58	0.99	0.09	5.02e-26	5.87e-26	1.05	0	0	0.881	0.891	0.128	268
Amines	Glutathione	31.27	0.75	0.04	1.13e-67	3.24e-67	1.9	0	0	6.84e-18	6.09e-17	0.097	0
Amines	Glycine	42.64	0.63	0.04	2.38e-42	3.36e-42	2.42	-0.01	0	1.63e-23	2.08e-22	0.071	0
Amines	Glycylglycine	37.3	0.68	0.04	3.88e-54	6.64e-54	2.12	-0.01	0	8.66e-19	8.57e-18	0.102	0
Amines	Glycylproline	13.09	0.94	0.05	6.02e-66	1.57e-65	1.23	0	0	0.0331	0.0528	0.102	0
Amines	Histamine	39.81	0.61	0.04	1.3e-40	1.75e-40	2.25	-0.01	0	1.18e-17	9.55e-17	0.188	0
Amines	Homocitrulline	15.09	0.95	0.06	1.03e-47	1.58e-47	1.26	0	0	0.0624	0.0925	0.103	0
Amines	Homocysteine	10.43	1.04	0.06	1.03e-54	1.84e-54	1.25	0	0	0.00227	0.0048	0.097	0
Amines	Hydroxylysine	6.76	1.12	0.09	8.42e-35	1.03e-34	1.06	0	0	0.535	0.603	0.105	0
Amines	L.2.aminoadipic.acid	28.24	0.78	0.05	8.27e-43	1.19e-42	1.68	0	0	1.93e-06	6.88e-06	0.1	0
Amines	L.4.hydroxy.proline	-11.55	1.3	0.08	2.55e-54	4.44e-54	0.89	0	0	0.726	0.76	0.096	0
Amines	L.Alanine	15.83	0.89	0.05	2.86e-69	8.79e-69	1.39	0	0	4.22e-05	0.000134	0.082	0
Amines	L.Alpha.aminobutyric.acid	9.97	0.99	0.06	5.81e-58	1.2e-57	1.2	0	0	0.0706	0.101	0.093	0
Amines	L.Arginine	15.32	0.91	0.05	6.13e-74	2.6e-73	1.31	0	0	0.000217	0.000622	0.102	0
Amines	L.Asparagine	1.63	1.08	0.06	4.4e-69	1.31e-68	1.02	0	0	0.666	0.715	0.092	0
Amines	L.Aspartic.acid	41.22	0.62	0.04	8.77e-51	1.44e-50	2.49	-0.01	0	7.68e-32	1.71e-30	0.111	0
Amines	L.Carnosine	-22.49	1.86	0.2	2.86e-19	3.07e-19	0.49	0	0	0.000245	0.000682	0.172	0
Amines	L.Glutamic.acid	23.98	0.8	0.05	6.14e-51	1.03e-50	1.62	0	0	1.73e-07	7.71e-07	0.102	0
Amines	L.Glutamine	18.36	0.84	0.04	2.75e-82	1.53e-81	1.45	0	0	3.42e-07	1.38e-06	0.083	0
Amines	L.Histidine	-17.04	1.33	0.08	1.09e-56	2.21e-56	0.69	0	0	0.00293	0.00592	0.106	0
Amines	L.Homoserine	21.07	0.83	0.05	7.7e-56	1.4e-55	1.5	0	0	2.42e-05	7.96e-05	0.123	0
Amines	L.Isoleucine	4.75	1	0.04	3.24e-94	3.21e-93	1.15	0	0	0.00765	0.0139	0.085	0
Amines	L.Kynurenine	-6.83	1.23	0.08	5.18e-46	7.69e-46	0.83	0	0	0.166	0.218	0.106	0
Amines	L.Leucine	9.3	0.95	0.04	1.19e-91	9.59e-91	1.19	0	0	0.0165	0.0283	0.084	0
Amines	L.Lysine	27.37	0.96	0.1	1.49e-20	1.66e-20	1.39	0	0	0.0332	0.0528	0.086	0
Amines	L.Methionine	0.15	1.07	0.05	2.28e-81	1.19e-80	0.98	0	0	0.981	0.981	0.087	0
Amines	L.Methionine.sulfoxide	3.21	1.08	0.08	1.67e-41	2.32e-41	1.1	0	0	0.102	0.14	0.115	0
Amines	L.Phenylalanine	17.99	0.84	0.04	2.03e-73	8.2e-73	1.43	0	0	1.16e-05	3.96e-05	0.081	0
Amines	L.Proline	17.59	0.88	0.04	3.84e-71	1.31e-70	1.51	0	0	6.96e-11	4.13e-10	0.098	0
Amines	L.Serine	23.42	0.79	0.03	1.77e-87	1.31e-86	1.64	0	0	8.85e-14	5.62e-13	0.079	0
Amines	L.Threonine	13.84	0.94	0.06	2.64e-56	5.1e-56	1.3	0	0	0.00388	0.00735	0.089	0
Amines	L.Tryptophan	17.1	0.86	0.05	4.93e-62	1.13e-61	1.34	0	0	0.00579	0.0107	0.082	0
Amines	L.Tyrosine	14.08	0.91	0.05	1.46e-60	3.17e-60	1.24	0	0	0.0639	0.0932	0.093	0
Amines	L.Valine	8.98	0.94	0.04	2.69e-97	3.99e-96	1.21	0	0	0.00301	0.00595	0.089	0
Amines	Methionine.sulfone	6	0.99	0.05	4.37e-83	2.59e-82	1.1	0	0	0.234	0.294	0.123	0
Amines	N6.N6.N6.Trimethyl.L.lysine	8.77	0.98	0.05	1.3e-70	4.3e-70	1.21	0	0	0.0152	0.0265	0.117	0
Amines	Norepinephrine	16.02	0.88	0.05	3.02e-50	4.89e-50	1.41	0	0	0.000353	0.000951	0.125	0
Amines	O.Acetyl.L.serine	26.24	0.75	0.04	1.4e-75	6.21e-75	1.8	0	0	1.08e-16	7.99e-16	0.101	0
Amines	O.Phosphoethanolamine	62.04	0.4	0.04	6.26e-20	6.87e-20	4.17	-0.02	0	2.31e-38	1.03e-36	0.097	0
Amines	O.Phosphoserine	36.07	0.74	0.11	7.95e-12	8.43e-12	1.7	0	0	0.0878	0.122	0.103	268
Amines	Ornithine	11.96	0.98	0.06	1.47e-56	2.9e-56	1.33	0	0	2.07e-07	8.76e-07	0.117	0
Amines	Putrescine	30.88	0.89	0.08	3.32e-27	3.99e-27	1.65	0	0	0.000462	0.00121	0.108	0
Amines	S.Methylcysteine	4.91	1.11	0.08	4.09e-41	5.61e-41	1.09	0	0	0.141	0.188	0.108	0
Amines	Saccharopine	2.7	1.03	0.05	7.15e-73	2.55e-72	1	0	0	0.845	0.865	0.197	0
Amines	Sarcosine	-11.63	1.33	0.09	2.37e-46	3.58e-46	0.8	0	0	0.188	0.239	0.139	0
Amines	SDMA	6.76	0.98	0.04	1.56e-83	9.95e-83	1.1	0	0	0.335	0.403	0.124	0
Amines	Serotonine	15.33	0.91	0.05	5.66e-66	1.53e-65	1.38	0	0	6.17e-05	0.000189	0.118	0
Amines	Taurine	36.2	0.82	0.08	4.89e-21	5.51e-21	1.92	0	0	1.56e-06	5.8e-06	0.093	0
Organic acids	2.hydroxybutyric.acid	9.01	0.98	0.05	6.17e-64	1.48e-63	1.11	0	0	0.478	0.553	0.058	2
Organic acids	3.Hydroxybutyric.acid	-2.88	1.38	0.14	7.32e-22	8.35e-22	0.91	0	0	0.629	0.691	0.051	2
Organic acids	3.Hydroxyisobutyric.acid	11.01	0.91	0.04	3.21e-107	5.72e-106	1.25	0	0	0.00137	0.00329	0.087	2
Organic acids	3.hydroxyisovaleric.acid	8.13	0.96	0.04	1.06e-85	7.23e-85	1.15	0	0	0.115	0.155	0.044	2
Organic acids	3.Hydroxypropionic.Acid	11.93	1	0.07	7.82e-45	1.14e-44	1.17	0	0	0.285	0.352	0.095	2
Organic acids	3.methyladipic.acid	15.28	0.94	0.05	4.6e-56	8.71e-56	1.27	0	0	0.039	0.0609	0.039	2
Organic acids	Adipic.acid	-13.2	1.33	0.08	2.65e-49	4.21e-49	0.75	0	0	0.0453	0.0695	0.037	2
Organic acids	Cis.aconitic.acid	3.06	0.99	0.04	1.66e-118	4.94e-117	0.99	0	0	0.501	0.571	0.064	2
Organic acids	Citric.acid	47.71	0.53	0.04	1.06e-37	1.37e-37	2.93	-0.01	0	7.36e-33	2.18e-31	0.027	2
Organic acids	Fumaric.acid	55.75	0.48	0.03	3.33e-49	5.2e-49	3.57	-0.01	0	8.28e-72	7.37e-70	0.018	2
Organic acids	Glutaric.acid	7.22	1.13	0.08	8.04e-38	1.05e-37	1.08	0	0	0.311	0.379	0.032	2
Organic acids	Glyceric.acid	15.47	0.9	0.05	2.38e-58	5.05e-58	1.36	0	0	0.000628	0.00155	0.104	2
Organic acids	Glycolic.acid	11.56	0.93	0.05	3.81e-67	1.06e-66	1.22	0	0	0.0569	0.0859	0.076	2
Organic acids	Homovanillic.acid	5.02	1.01	0.04	1.2e-93	1.07e-92	1.05	0	0	0.69	0.732	0.04	2
Organic acids	Isocitrate	14.5	0.86	0.03	1.67e-111	3.72e-110	1.26	0	0	0.017	0.0285	0.058	2
Organic acids	Malic.acid	12.07	0.95	0.05	8.65e-70	2.75e-69	1.19	0	0	0.179	0.231	0.064	2
Organic acids	Methylmalonic.acid	-13.5	1.25	0.07	1.4e-63	3.28e-63	0.84	0	0	0.641	0.695	0.076	2
Organic acids	Pyroglutamic.acid	-6.81	1.1	0.04	1.33e-138	1.19e-136	0.81	0	0	0.000608	0.00155	0.054	2
Organic acids	Succinic.acid	32.85	0.72	0.05	3.25e-36	4.02e-36	1.9	0	0	4.06e-08	1.9e-07	0.029	2
Organic acids	Uracil	28.99	0.78	0.06	3.01e-40	4e-40	1.72	0	0	3.78e-07	1.46e-06	0.048	2
Other	C.peptide	-0.57	1.21	0.09	5.79e-37	7.37e-37	0.82	0	0	0.0327	0.0528	NA	2
Other	creatinine	-4.4	1.05	0.03	6.79e-135	3.02e-133	0.85	0	0	0.00175	0.00399	NA	4
Other	neopterin	-0.62	1.11	0.06	2.99e-61	6.66e-61	0.93	0	0	0.441	0.523	NA	1
Other	oxDNARNA	53.27	0.53	0.06	1.28e-19	1.39e-19	3.03	-0.01	0	3.35e-20	3.73e-19	NA	6
Other	Substance.P	-19.13	1.29	0.05	4.26e-97	5.42e-96	0.69	0	0	0.000189	0.000561	NA	5

## Sheet: Table S4
Supplementary Table 4. Overview of endorsement of mother-rated CBCL Aggressive Behavior subscale. Endorsement for each of the 18 items of the CBCL Aggressive Behavior subscale is provided for the subjects in the Discovery, Replication and Validation phase. This overview includes the total endorsement of each response for the total group, as well as seperately for twin scoring low or high on overa…
Item abbreviation	Item contenta	Answer categories	Responses	Discovery			Replication all			Replication MZ-only			Validation
				low	high	total	low	high	total	low	high	total	control	case	total
Argues	3. Argues a lot	original	not/never	213	92	305	90	67	157	74	62	136	116	49	165
Argues	3. Argues a lot	original	a little/sometimes	185	210	395	86	98	184	68	78	146	58	81	139
Argues	3. Argues a lot	original	very/often	16	55	71	12	23	35	10	12	22	7	51	58
Argues	3. Argues a lot	dichotomized	control	213	92	305	90	67	157	74	62	136	116	49	165
Argues	3. Argues a lot	dichotomized	case	201	265	466	98	121	219	78	90	168	65	132	197
Mean	16. Cruelty, bullying or meanness to others	original	not/never	389	259	648	154	148	302	129	129	258	167	109	276
Mean	16. Cruelty, bullying or meanness to others	original	a little/sometimes	24	91	115	34	39	73	23	23	46	14	56	70
Mean	16. Cruelty, bullying or meanness to others	original	very/often	1	6	7	0	1	1	0	0	0	1	15	16
Mean	16. Cruelty, bullying or meanness to others	dichotomized	control	389	259	648	154	148	302	129	129	258	167	109	276
Mean	16. Cruelty, bullying or meanness to others	dichotomized	case	25	97	122	34	40	74	23	23	46	15	71	86
DemandsAttention	19. Demands a lot of attention	original	not/never	313	167	480	115	91	206	96	84	180	142	28	170
DemandsAttention	19. Demands a lot of attention	original	a little/sometimes	88	135	223	64	69	133	51	52	103	31	58	89
DemandsAttention	19. Demands a lot of attention	original	very/often	12	55	67	9	26	35	5	14	19	9	95	104
DemandsAttention	19. Demands a lot of attention	dichotomized	control	313	167	480	115	91	206	96	84	180	142	28	170
DemandsAttention	19. Demands a lot of attention	dichotomized	case	100	190	290	73	95	168	56	66	122	40	153	193
DestroysOwnProperty	20. Destroys his/her own things	original	not/never	395	281	676	172	163	335	139	137	276	171	119	290
DestroysOwnProperty	20. Destroys his/her own things	original	a little/sometimes	18	68	86	14	20	34	11	11	22	11	51	62
DestroysOwnProperty	20. Destroys his/her own things	original	very/often	1	8	9	1	4	5	1	3	4	0	10	10
DestroysOwnProperty	20. Destroys his/her own things	dichotomized	control	395	281	676	172	163	335	139	137	276	171	119	290
DestroysOwnProperty	20. Destroys his/her own things	dichotomized	case	19	76	95	15	24	39	12	14	26	11	61	72
DestroysPropertyOthers	21. Destroys things belonging to his/her family or others	original	not/never	396	283	679	178	167	345	144	141	285	168	119	287
DestroysPropertyOthers	21. Destroys things belonging to his/her family or others	original	a little/sometimes	15	72	87	10	17	27	8	9	17	14	58	72
DestroysPropertyOthers	21. Destroys things belonging to his/her family or others	original	very/often	0	2	2	0	2	2	0	1	1	0	4	4
DestroysPropertyOthers	21. Destroys things belonging to his/her family or others	dichotomized	control	396	283	679	178	167	345	144	141	285	168	119	287
DestroysPropertyOthers	21. Destroys things belonging to his/her family or others	dichotomized	case	15	74	89	10	19	29	8	10	18	14	62	76
DisobedientHome	22. Disobedient at home	original	not/never	288	134	422	92	80	172	79	70	149	131	42	173
DisobedientHome	22. Disobedient at home	original	a little/sometimes	118	195	313	91	99	190	71	78	149	50	89	139
DisobedientHome	22. Disobedient at home	original	very/often	7	28	35	3	8	11	2	3	5	1	50	51
DisobedientHome	22. Disobedient at home	dichotomized	control	288	134	422	92	80	172	79	70	149	131	42	173
DisobedientHome	22. Disobedient at home	dichotomized	case	125	223	348	94	107	201	73	81	154	51	139	190
DisobedientSchool	23. Disobedient at school	original	not/never	382	270	652	154	148	302	125	122	247	166	94	260
DisobedientSchool	23. Disobedient at school	original	a little/sometimes	29	80	109	34	38	72	27	28	55	15	60	75
DisobedientSchool	23. Disobedient at school	original	very/often	2	8	10	0	1	1	0	1	1	0	27	27
DisobedientSchool	23. Disobedient at school	dichotomized	control	382	270	652	154	148	302	125	122	247	166	94	260
DisobedientSchool	23. Disobedient at school	dichotomized	case	31	88	119	34	39	73	27	29	56	15	87	102
Fights	37. Get in many fights	original	not/never	402	291	693	172	167	339	140	136	276	171	135	306
Fights	37. Get in many fights	original	a little/sometimes	10	58	68	14	19	33	10	15	25	10	38	48
Fights	37. Get in many fights	original	very/often	2	10	12	1	2	3	1	1	2	0	8	8
Fights	37. Get in many fights	dichotomized	control	402	291	693	172	167	339	140	136	276	171	135	306
Fights	37. Get in many fights	dichotomized	case	12	68	80	15	21	36	11	16	27	10	46	56
PhysicallyAttacks	57. Physically attacks people	original	not/never	401	327	728	177	167	344	145	139	284	175	130	305
PhysicallyAttacks	57. Physically attacks people	original	a little/sometimes	5	30	35	9	18	27	7	11	18	6	40	46
PhysicallyAttacks	57. Physically attacks people	original	very/often	3	2	5	0	1	1	0	0	0	1	11	12
PhysicallyAttacks	57. Physically attacks people	dichotomized	control	401	327	728	177	167	344	145	139	284	175	130	305
PhysicallyAttacks	57. Physically attacks people	dichotomized	case	8	32	40	9	19	28	7	11	18	7	51	58
Screams	68. Screams a lot	original	not/never	346	160	506	131	118	249	107	104	211	146	70	216
Screams	68. Screams a lot	original	a little/sometimes	59	152	211	44	53	97	35	37	72	30	67	97
Screams	68. Screams a lot	original	very/often	6	44	50	10	16	26	8	10	18	5	44	49
Screams	68. Screams a lot	dichotomized	control	346	160	506	131	118	249	107	104	211	146	70	216
Screams	68. Screams a lot	dichotomized	case	65	196	261	54	69	123	43	47	90	35	111	146
Stubborn	86. Stubborn, sullen or irritable	original	not/never	282	114	396	98	76	174	83	67	150	113	23	136
Stubborn	86. Stubborn, sullen or irritable	original	a little/sometimes	105	188	293	74	80	154	55	64	119	61	81	142
Stubborn	86. Stubborn, sullen or irritable	original	very/often	19	56	75	16	30	46	14	19	33	7	77	84
Stubborn	86. Stubborn, sullen or irritable	dichotomized	control	282	114	396	98	76	174	83	67	150	113	23	136
Stubborn	86. Stubborn, sullen or irritable	dichotomized	case	124	244	368	90	110	200	69	83	152	68	158	226
MoodSwings	87. Sudden changes in mood or feelings	original	not/never	346	214	560	137	119	256	112	106	218	148	45	193
MoodSwings	87. Sudden changes in mood or feelings	original	a little/sometimes	53	110	163	41	50	91	32	33	65	28	62	90
MoodSwings	87. Sudden changes in mood or feelings	original	very/often	8	35	43	9	18	27	7	12	19	4	74	78
MoodSwings	87. Sudden changes in mood or feelings	dichotomized	control	346	214	560	137	119	256	112	106	218	148	45	193
MoodSwings	87. Sudden changes in mood or feelings	dichotomized	case	61	145	206	50	68	118	39	45	84	32	136	168
Sulks	88. Sulks	original	not/never	330	186	516	125	106	231	103	92	195	137	58	195
Sulks	88. Sulks	original	a little/sometimes	69	147	216	55	67	122	43	51	94	39	76	115
Sulks	88. Sulks	original	very/often	7	25	32	6	13	19	4	7	11	4	47	51
Sulks	88. Sulks	dichotomized	control	330	186	516	125	106	231	103	92	195	137	58	195
Sulks	88. Sulks	dichotomized	case	76	172	248	61	80	141	47	58	105	43	123	166
Suspicious	89. Suspicious	original	not/never	395	317	712	172	161	333	139	134	273	169	110	279
Suspicious	89. Suspicious	original	a little/sometimes	12	37	49	16	21	37	13	13	26	8	52	60
Suspicious	89. Suspicious	original	very/often	0	3	3	0	4	4	0	3	3	4	19	23
Suspicious	89. Suspicious	dichotomized	control	395	317	712	172	161	333	139	134	273	169	110	279
Suspicious	89. Suspicious	dichotomized	case	12	40	52	16	25	41	13	16	29	12	71	83
Teases	94. Teases a lot	original	not/never	391	298	689	174	168	342	143	144	287	169	127	296
Teases	94. Teases a lot	original	a little/sometimes	13	53	66	12	18	30	7	7	14	10	48	58
Teases	94. Teases a lot	original	very/often	0	5	5	0	1	1	0	0	0	1	6	7
Teases	94. Teases a lot	dichotomized	control	391	298	689	174	168	342	143	144	287	169	127	296
Teases	94. Teases a lot	dichotomized	case	13	58	71	12	19	31	7	7	14	11	54	65
Temper	95. Temper tantrums or hot temper	original	not/never	344	178	522	133	109	242	111	97	208	148	56	204
Temper	95. Temper tantrums or hot temper	original	a little/sometimes	46	130	176	48	61	109	34	43	77	30	52	82
Temper	95. Temper tantrums or hot temper	original	very/often	14	50	64	4	15	19	4	9	13	2	73	75
Temper	95. Temper tantrums or hot temper	dichotomized	control	344	178	522	133	109	242	111	97	208	148	56	204
Temper	95. Temper tantrums or hot temper	dichotomized	case	60	180	240	52	76	128	38	52	90	32	125	157
Threatens	97. Threatens other people	original	not/never	402	350	752	184	182	366	149	148	297	180	149	329
Threatens	97. Threatens other people	original	a little/sometimes	0	6	6	1	2	3	1	1	2	1	29	30
Threatens	97. Threatens other people	original	very/often	0	1	1	0	0	0	0	0	0	0	3	3
Threatens	97. Threatens other people	dichotomized	control	402	350	752	184	182	366	149	148	297	180	149	329
Threatens	97. Threatens other people	dichotomized	case	0	7	7	1	2	3	1	1	2	1	32	33
Loud	104. Unusually loud	original	not/never	371	229	600	154	139	293	126	116	242	161	73	234
Loud	104. Unusually loud	original	a little/sometimes	31	91	122	27	39	66	23	31	54	12	64	76
Loud	104. Unusually loud	original	very/often	6	35	41	6	9	15	2	4	6	5	44	49
Loud	104. Unusually loud	dichotomized	control	371	229	600	154	139	293	126	116	242	161	73	234
Loud	104. Unusually loud	dichotomized	case	37	126	163	33	48	81	25	35	60	17	108	125

## Sheet: Table S5
Supplementary Table 5. Longitudinal, multi-rater, multi-instrument, phenotypic assessment for all twins with urine samples (N = 1,347), by collection wave, rater and aggression concordance at invitation into ACTION.
Wave & instrument*		Concordant low			Discordant (N = 386)						Concordant High
		(N = 606)			Low (N = 189)			High (N = 189)			(N = 364)
		Mother	Father	Teacher	Mother	Father	Teacher	Mother	Father	Teacher	Mother	Father	Teacher
1	N (missing)	474 (131)	396 (131)	-	172 (17)	151 (38)	-	176 (13)	151 (38)	-	332 (32)	235 (32)	-
	mean (sd)	6.5 (5.3)	7.2 (5.3)		10.1 (4.1)	9.4 (4.6)		15.6 (5.5)	12.6 (6)		17.4 (6.2)	12.9 (6.2)
2	N (missing)	470 (135)	440 (165)	-	153 (36)	146 (43)	-	153 (36)	146 (43)	-	276 (88)	230 (134)	-
	mean (sd)	10.5 (3)	11.2 (3.2)		12.2 (3.5)	12.3 (3.4)		13.1 (3.8)	13 (3.9)		13 (3.9)	13.1 (3.6)
3	N (missing)	262 (343)	196 (409)	309 (296)	107 (82)	77 (112)	104 (85)	105 (84)	79 (110)	105 (84)	151 (213)	111 (253)	162 (202)
	mean (sd)	2.7 (3)	2.9 (3.1)	1.5 (2.8)	4.6 (3.8)	3.7 (3.5)	2.4 (4.3)	7.5 (6.1)	5.9 (5.3)	3.4 (6.3)	9.6 (6.5)	8.4 (7.1)	2.6 (4.4)
4	N (missing)	242 (363)	166 (439)	195 (410)	116 (73)	85 (104)	90 (99)	115 (74)	85 (104)	86 (103)	194 (170)	127 (237)	140 (224)
	mean (sd)	2.5 (3.4)	2.2 (2.9)	1.2 (3.2)	3.6 (3.6)	3.8 (3.7)	2.2 (4)	5.7 (4.5)	5.1 (5.1)	4.3 (6.9)	7.4 (5.5)	4.8 (4.8)	3.4 (5.5)
5	N (missing)	80 (525)	56 (549)	-	76 (113)	55 (134)	-	75 (114)	55 (134)	-	126 (238)	84 (280)	-
	mean (sd)	0.5 (0.8)	0.8 (1.1)		0.7 (1)	1 (1)		1.5 (1.6)	1.4 (1.4)		1.5 (1.5)	1.3 (1.6)
6	N (missing)	80 (525)	56 (549)	-	75 (114)	55 (134)	-	75 (114)	55 (134)	-	126 (238)	84 (280)	-
	mean (sd)	0.6 (0.9)	0.7 (0.7)		1.1 (1)	1.3 (1)		1.6 (1.2)	1.3 (1.2)		1.4 (1.1)	1.2 (1)
7	N (missing)	77 (528)	54 (551)	-	67 (122)	52 (137)	-	72 (117)	53 (136)	-	121 (243)	79 (285)	-
	mean (sd)	0.1 (0.2)	0 (0.2)		0.2 (0.7)	0.1 (0.4)		0.3 (0.4)	0.2 (0.3)		0.4 (0.7)	0.3 (0.5)
8	N (missing)	153 (452)	62 (543)	127 (478)	59 (130)	31 (158)	57 (132)	59 (130)	31 (158)	60 (129)	100 (264)	36 (328)	75 (289)
	mean (sd)	1.2 (1.5)	1 (1.6)	1.5 (3.9)	1.5 (1.6)	2.1 (2.2)	1.8 (2.7)	2.4 (2.5)	2.6 (2.8)	2.6 (3.6)	2.4 (2.1)	3.1 (2.6)	2.3 (4.5)
9	N (missing)	588 (17)	541 (64)	-	188 (1)	162 (27)	-	186 (3)	162 (27)	-	358 (6)	296 (68)	-
	mean (sd)	2.7 (3.8)	3.2 (4.1)		4.4 (4.4)	3.4 (3.6)		6.2 (5.8)	4.7 (4.7)		7.6 (6)	6.5 (5.9)
*wave and instruments: 1 = collection wave 1 at age 3 includes the parent-rated ASEBA CBCL; 2 = collection wave 2 at age 5 includes the parent-rated DCB; 3 = collection wave 3 at age 7 includes the parent-rated ASEBA CBCL and the teacher-rated ASEBA TRF; 4 = collection wave 4 at age 10 includes the parent-rated ASEBA CBCL and the teacher-rated ASEBA TRF; 5 = collection wave 4 at age 10 includes t…

## Sheet: Table S6
Supplementary Table 6. Discovery results for the association of amines, organic acids and other biomarkers. Discovery analyses were performed with GEE for 783 twins with low or high aggression. Sex and age at urine collection were included in the model as covariates. Aggression was included as a dichotomous variable (low vs. high), with the low aggression status being the intercept. Sex was coded…
Platform	Metabolite	N	Beta				Robust SE				p-value				FDR p-value
			Intercept	aggression_high	sex_male	age at collection	Intercept	aggression_high	sex_male	age at collection	Intercept	aggression_high	sex_male	age at collection	aggression_high
Amines	O.Phosphoserine	783	-0.0886831	0.360517	0.0142851	-0.00721327	0.238685	0.0888942	0.0850485	0.0241916	0.710229	5.00127e-05	0.866611	0.765571	0.00445113
Amines	Gamma.L.glutamyl.L.alanine	783	-0.750887	0.316521	-0.20532	0.0776652	0.22882	0.0875961	0.0842201	0.024359	0.00103237	0.000302193	0.0147728	0.00143086	0.0134476
Amines	Gamma.Glutamylglutamine	783	0.345573	-0.252562	-0.0957492	-0.0182394	0.2278	0.0879432	0.080827	0.0234832	0.129267	0.00408048	0.236168	0.437337	0.0907907
Amines	L.Methionine.sulfoxide	783	-0.148062	0.182901	0.104544	0.00222914	0.234968	0.0883373	0.087338	0.0240009	0.528606	0.0384069	0.231305	0.926001	0.569703
Amines	L.Tyrosine	783	-0.228671	0.165152	0.375285	-0.0113457	0.216043	0.0858688	0.0860925	0.0226238	0.289849	0.0544416	1.30601e-05	0.616023	0.664518
Amines	L.2.aminoadipic.acid	783	0.0619373	0.157267	0.0808304	-0.0221793	0.226928	0.0860992	0.0851318	0.0228957	0.7849	0.0677623	0.34238	0.33269	0.670094
Amines	L.Phenylalanine	783	-0.0883904	0.147513	0.267163	-0.0190844	0.218168	0.0859851	0.086359	0.0229209	0.685368	0.0862415	0.00197725	0.40506	0.76755
Amines	Norepinephrine	783	0.00276263	0.132699	0.335516	-0.0293533	0.221603	0.0837526	0.0845913	0.0229633	0.990053	0.113098	7.2991e-05	0.201154	0.794588
Amines	Ethanolamine	783	-0.240021	0.126259	0.0617425	0.0125035	0.222744	0.0828246	0.0824136	0.02281	0.281228	0.127405	0.45375	0.583581	0.794588
Amines	L.Tryptophan	783	-0.469344	0.128025	0.395874	0.0163303	0.222448	0.087566	0.0851191	0.0232854	0.0348663	0.143731	3.30603e-06	0.483109	0.794588
Amines	L.Threonine	783	-0.663025	0.12543	0.084204	0.0559414	0.220579	0.0860479	0.0847727	0.0221578	0.00264847	0.144928	0.320568	0.0115803	0.794588
Amines	L.Valine	783	0.2583	0.1174	0.0311969	-0.0372714	0.228838	0.0868375	0.0871361	0.0229321	0.259006	0.17639	0.720325	0.104099	0.794588
Amines	N6.N6.N6.Trimethyl.L.lysine	783	-0.023635	0.114036	0.0168165	-0.00260547	0.216338	0.0852259	0.0836827	0.0213199	0.913004	0.180884	0.840733	0.902734	0.794588
Amines	L.Aspartic.acid	783	-0.232892	0.109927	-0.0210333	0.0179662	0.206512	0.0825243	0.0810333	0.021502	0.25943	0.182841	0.7952	0.403402	0.794588
Amines	L.Arginine	783	0.189788	-0.110586	0.0582281	-0.0186321	0.225629	0.0849932	0.0872554	0.0241099	0.400264	0.193218	0.504562	0.439641	0.794588
Amines	L.Alpha.aminobutyric.acid	783	0.300925	0.109392	0.00425413	-0.0409299	0.235732	0.0889226	0.086829	0.024323	0.201759	0.218626	0.960924	0.0924202	0.794588
Amines	1.Methylhistidine	783	-0.213214	0.084446	0.0313847	0.0407214	0.178495	0.0702314	0.0686659	0.018228	0.232279	0.229209	0.647625	0.0254829	0.794588
Amines	L.Homoserine	783	0.235122	0.0952504	-0.0637011	-0.023832	0.204905	0.0798295	0.0792322	0.0212227	0.251187	0.232802	0.421409	0.261459	0.794588
Amines	Cysteine	783	-0.342259	-0.0970657	-0.0557055	0.0434149	0.210426	0.0818449	0.0805678	0.0212851	0.103843	0.235634	0.489307	0.0413814	0.794588
Amines	Glutathione	783	-0.112568	-0.096621	-0.0403942	0.0156966	0.233765	0.0825404	0.0828322	0.0230368	0.63013	0.241763	0.625789	0.495636	0.794588
Amines	L.Leucine	783	-0.0445404	0.103086	0.0801772	-0.00641372	0.226439	0.0887356	0.0887931	0.0231467	0.844063	0.24535	0.366544	0.781711	0.794588
Amines	L.Isoleucine	783	-0.232659	0.0984231	-0.0275925	0.0198475	0.219183	0.0852586	0.086124	0.0220894	0.288469	0.248333	0.74868	0.368915	0.794588
Amines	ADMA	783	0.426768	0.0978424	0.0151701	-0.0494565	0.220425	0.0851545	0.0859067	0.0229628	0.0528538	0.250557	0.859832	0.0312586	0.794588
Amines	Glycylglycine	783	-0.2193	-0.100039	-0.0157709	0.0332252	0.232026	0.0909558	0.0893694	0.0232964	0.34458	0.271393	0.859925	0.153812	0.794588
Amines	Glycylproline	783	-0.218317	0.0987155	-0.00757126	0.0215047	0.22473	0.0908503	0.0904057	0.0232558	0.331318	0.277225	0.933257	0.355122	0.794588
Amines	Histamine	783	-0.077636	0.0882461	0.20788	-0.00666045	0.234778	0.0826572	0.0816117	0.0234806	0.740888	0.285694	0.0108598	0.776673	0.794588
Amines	Sarcosine	783	0.290074	0.0848541	0.0888454	-0.0410247	0.221002	0.0861047	0.084216	0.0225443	0.189337	0.324391	0.291439	0.0687993	0.84914
Amines	Homocysteine	783	-0.628123	-0.0810562	0.0663633	0.0666391	0.214863	0.0851952	0.084643	0.0226043	0.00346272	0.341392	0.433018	0.00319755	0.849975
Amines	Saccharopine	783	-0.427844	0.0769956	-0.0916526	0.0434756	0.217032	0.0823204	0.0792898	0.0222785	0.0486854	0.349626	0.247714	0.0510023	0.849975
Amines	O.Acetyl.L.serine	783	0.260374	0.0772282	-0.0306335	-0.0315632	0.222535	0.0832118	0.0824138	0.0227382	0.241987	0.35336	0.710114	0.165102	0.849975
Amines	L.Proline	783	0.162418	0.0729526	-0.0971131	-0.0164822	0.220852	0.0835614	0.0824774	0.0224537	0.462085	0.38264	0.239016	0.462915	0.875215
Amines	L.Alanine	783	-0.296444	0.0718995	0.0531041	0.0238376	0.2233	0.0825078	0.0814237	0.0223643	0.184325	0.383521	0.514275	0.286478	0.875215
Amines	Anserine	783	0.570071	0.0736148	-0.0342994	-0.0567472	0.231956	0.0900657	0.0871728	0.0242657	0.0139841	0.413731	0.693976	0.0193572	0.884913
Amines	Cystathionine	783	-0.197879	-0.0734498	0.0325752	0.0255722	0.236016	0.0914695	0.0906447	0.0239354	0.4018	0.421976	0.719316	0.285345	0.884913
Amines	Glycine	783	-0.587296	0.0685943	-0.204048	0.068577	0.232655	0.0854377	0.0825434	0.0228466	0.011592	0.422058	0.0134358	0.00268535	0.884913
Amines	Beta.Alanine	783	0.238904	-0.0599887	-0.267201	-0.00326121	0.235716	0.0844041	0.0843302	0.0233049	0.31081	0.47725	0.00153222	0.88871	0.918833
Amines	L.Glutamic.acid	783	-0.0819137	0.0617332	-0.019622	0.00252571	0.223131	0.086861	0.0806913	0.0229749	0.713537	0.477262	0.807871	0.912462	0.918833
Amines	3.Methylhistidine	783	0.14626	0.0607053	-0.0436623	-0.0115048	0.230167	0.0869801	0.0848444	0.0228151	0.525136	0.485226	0.606821	0.614077	0.918833
Amines	3.Methoxytyrosine	783	0.197149	0.0590254	0.263929	-0.0430673	0.225158	0.0871731	0.0837935	0.0230357	0.381245	0.498339	0.00163408	0.0615413	0.919915
Amines	L.Kynurenine	783	-0.246716	0.0588844	0.338828	-0.00131019	0.226887	0.0895858	0.0872356	0.0237294	0.276862	0.51099	0.000102727	0.955968	0.919915
Amines	L.Methionine	783	0.146813	0.0556781	0.0288816	-0.0197222	0.209598	0.089878	0.0895843	0.0217532	0.483648	0.535597	0.747153	0.364599	0.919915
Amines	Methionine.sulfone	783	-0.149587	0.0494087	0.32683	-0.00683304	0.224512	0.0851313	0.0826855	0.022935	0.505233	0.561657	7.72769e-05	0.765757	0.943159
Amines	L.Lysine	783	-0.242365	-0.0438454	0.0848409	0.0213106	0.237799	0.088701	0.0925251	0.0242514	0.308106	0.621091	0.359169	0.379544	0.983481
Amines	Citrulline	783	-0.108003	0.0369129	0.237896	-0.00405514	0.206287	0.0851168	0.0914242	0.021628	0.600587	0.664525	0.0092652	0.851272	0.991653
Amines	Serotonine	783	0.426419	0.0316051	0.0605865	-0.0497647	0.219598	0.0878974	0.0910849	0.0228208	0.052159	0.719171	0.505945	0.0292076	0.992309
Amines	O.Phosphoethanolamine	783	0.569246	0.0297462	0.0113885	-0.063643	0.22551	0.0854732	0.0833229	0.0227907	0.0115939	0.727827	0.891285	0.00523016	0.992309
Amines	L.Glutamine	783	-0.132741	0.0267527	0.0307	0.00901942	0.232583	0.088762	0.0860979	0.0236477	0.568185	0.763111	0.721413	0.702901	0.992309
Amines	Taurine	783	-0.279758	-0.0183798	-0.131806	0.0361273	0.233128	0.0856245	0.0836534	0.0238143	0.230131	0.830036	0.115112	0.129257	0.992309
Amines	Epinephrine	783	0.060346	-0.017605	0.159946	-0.0180575	0.240732	0.0842265	0.0809318	0.0243666	0.802064	0.834433	0.0481207	0.458648	0.992309
Amines	Homocitrulline	783	0.0832764	0.0170061	0.198896	-0.0187546	0.210954	0.0839959	0.0823762	0.0218801	0.693019	0.839555	0.0157576	0.391359	0.992309
Amines	DL.3.aminoisobutyric.acid	783	0.640496	-0.0158783	-0.135784	-0.0595132	0.228982	0.0898128	0.0927837	0.0235122	0.00515569	0.859671	0.143346	0.0113684	0.992309
Amines	S.Methylcysteine	783	0.00290075	0.0141939	-0.0488678	-0.00269435	0.220928	0.089329	0.0923122	0.0228086	0.989524	0.873752	0.596545	0.905966	0.992309
Amines	L.Carnosine	783	0.645438	0.0122149	0.117138	-0.0708227	0.231995	0.0886331	0.0858098	0.0232973	0.0054004	0.890387	0.172224	0.00236612	0.992309
Amines	Gamma.aminobutyric.acid	783	-0.0325543	-0.0104143	-0.060111	0.0077297	0.205093	0.083564	0.0846615	0.0204079	0.873882	0.90082	0.477695	0.704865	0.992309
Amines	5.Hydroxy.L.tryptophan	783	0.972954	-0.0096991	0.0195335	-0.103515	0.217928	0.0845988	0.0855535	0.0226876	8.02338e-06	0.908724	0.819398	5.05138e-06	0.992309
Amines	L.Serine	783	-0.0435039	0.00904503	-0.0836856	0.00792798	0.21133	0.0850809	0.0818611	0.0216158	0.836902	0.915336	0.306645	0.713792	0.992309
Amines	Putrescine	783	0.296291	0.00789721	-0.612634	0.00633789	0.208866	0.0800508	0.0806486	0.021103	0.156025	0.921414	3.04625e-14	0.763924	0.992309
Amines	Ornithine	783	0.0999566	0.0069938	-0.0524052	-0.00743436	0.211221	0.0851967	0.0866058	0.0227984	0.636047	0.934575	0.545112	0.744356	0.992309
Amines	SDMA	783	0.370529	-0.00521224	0.00668116	-0.0395832	0.221309	0.0853703	0.0849739	0.0228356	0.0940796	0.951316	0.93733	0.0830253	0.992309
Amines	L.Histidine	783	-0.595319	-0.00374433	0.441196	0.0365596	0.231531	0.0892698	0.0881881	0.0239856	0.0101338	0.966543	5.64753e-07	0.127451	0.992309
Amines	L.4.hydroxy.proline	783	0.122927	0.0033193	-0.0337975	-0.0112206	0.218494	0.0866835	0.0860945	0.0225261	0.573702	0.969455	0.694643	0.618404	0.992309
Amines	L.Asparagine	783	-0.610176	-0.00179804	0.22993	0.0524552	0.213126	0.0845263	0.0827971	0.0220892	0.00419683	0.983029	0.00548589	0.0175635	0.992309
Amines	3.Methoxytyramine	783	0.558443	-0.00146754	-0.10837	-0.0511237	0.208875	0.082742	0.0835194	0.0218408	0.00750468	0.985849	0.194444	0.0192456	0.992309
Amines	Hydroxylysine	783	-0.091836	0.000855027	-0.0716896	0.0141612	0.226185	0.088706	0.0899675	0.0232961	0.684727	0.992309	0.425544	0.543268	0.992309
Organic acids	Succinic.acid	783	-0.0971731	0.160708	-0.0300127	0.00503707	0.227355	0.0853576	0.0773353	0.0236138	0.669082	0.0597319	0.697953	0.831085	0.664518
Organic acids	Glyceric.acid	783	-0.182972	0.115757	-0.103365	0.0158627	0.242748	0.0889009	0.0856162	0.0253278	0.450997	0.192885	0.227315	0.53112	0.794588
Organic acids	Isocitrate	783	-0.384858	0.085214	-0.178608	0.0422979	0.219386	0.0846462	0.0845545	0.0225929	0.0793875	0.314075	0.0346571	0.0611824	0.84705
Organic acids	3.Hydroxyisobutyric.acid	783	-0.347835	0.0662166	-0.232886	0.0412007	0.213932	0.0847695	0.0832719	0.0220933	0.103968	0.434722	0.00516274	0.0622022	0.884913
Organic acids	3.methyladipic.acid	783	-0.127265	-0.0673412	-0.217239	0.0250814	0.227703	0.08673	0.0857947	0.0228687	0.576225	0.437485	0.0113387	0.272747	0.884913
Organic acids	Adipic.acid	783	-0.246856	-0.0572769	-0.171315	0.0391537	0.222123	0.0885501	0.0885251	0.0232593	0.26642	0.517741	0.0529638	0.0923064	0.919915
Organic acids	3.Hydroxybutyric.acid	783	-0.12851	-0.0531146	-0.163331	0.0217162	0.234463	0.0861367	0.082589	0.0239456	0.583619	0.537478	0.04797	0.364461	0.919915
Organic acids	Malic.acid	783	-0.319309	-0.0486346	-0.160512	0.0396714	0.22849	0.0889112	0.0835347	0.0233169	0.16227	0.584377	0.0546684	0.0888683	0.96314
Organic acids	Glycolic.acid	783	-1.1037	0.0441632	-0.34527	0.130348	0.217127	0.0834572	0.0847079	0.0214226	3.71105e-07	0.596686	4.58161e-05	1.16792e-09	0.965547
Organic acids	Pyroglutamic.acid	783	-0.15469	0.0412765	0.0132395	0.00807821	0.233159	0.085652	0.0836965	0.0240853	0.507043	0.62987	0.874311	0.737323	0.983481
Organic acids	Methylmalonic.acid	783	-0.622188	0.0388442	-0.130004	0.0674443	0.237841	0.0886781	0.0871107	0.0239987	0.0088972	0.66136	0.135595	0.00494906	0.991653
Organic acids	3.Hydroxypropionic.Acid	783	-0.591916	-0.0382115	-0.184004	0.0748227	0.249741	0.0892446	0.0877468	0.0249223	0.0177826	0.66853	0.0359951	0.00268006	0.991653
Organic acids	Homovanillic.acid	783	0.951143	-0.034921	-0.130576	-0.0931848	0.22424	0.088177	0.0871108	0.0233969	2.21893e-05	0.692081	0.133884	6.81114e-05	0.992309
Organic acids	Citric.acid	783	-0.639187	0.0338995	-0.328567	0.0786945	0.247086	0.0859582	0.0817216	0.0248672	0.00968449	0.693306	5.806e-05	0.00155301	0.992309
Organic acids	2.hydroxybutyric.acid	783	0.0226898	-0.0270878	-0.124258	0.00570828	0.246418	0.0875566	0.0848211	0.0250583	0.926635	0.757037	0.142938	0.819801	0.992309
Organic acids	Fumaric.acid	783	0.0763027	0.0248469	-0.277403	0.00303852	0.211112	0.0818693	0.0745472	0.0219989	0.717777	0.761513	0.000198301	0.890144	0.992309
Organic acids	Uracil	783	0.167473	-0.0178541	-0.0492747	-0.0171116	0.230915	0.0857595	0.0841525	0.0234784	0.468292	0.835082	0.558184	0.46611	0.992309
Organic acids	3.hydroxyisovaleric.acid	783	-0.226899	-0.0154963	-0.0743004	0.0231684	0.239348	0.0920768	0.0852224	0.0237684	0.343136	0.866349	0.383295	0.32968	0.992309
Organic acids	Cis.aconitic.acid	783	-0.696975	0.00953278	-0.089297	0.0701865	0.213539	0.0824569	0.082925	0.0220932	0.00109879	0.907962	0.281551	0.00148887	0.992309
Organic acids	Glutaric.acid	783	0.085849	-0.00867075	-0.045781	-0.00530841	0.224833	0.0872095	0.0827681	0.0231408	0.702584	0.920801	0.580179	0.818561	0.992309
Other	creatinine	785	-1.54387	0.242049	-0.187481	0.152424	0.217863	0.0802067	0.0817436	0.0223067	1.37618e-12	0.00254605	0.0218181	8.31089e-12	0.0755328
Other	oxDNARNA	785	-0.372371	0.185659	-0.293447	0.0411633	0.219622	0.0858465	0.0819508	0.0231481	0.0899781	0.0305651	0.000342579	0.0753616	0.544058
Other	Substance.P	785	-0.884204	0.0956491	-0.133054	0.0919715	0.224132	0.0828305	0.0809993	0.0232763	7.97972e-05	0.24819	0.100453	7.77311e-05	0.794588
Other	neopterin	785	0.648184	0.0886152	-0.0672375	-0.0685778	0.216765	0.082601	0.0820585	0.022492	0.00278734	0.283356	0.412567	0.00229616	0.794588
Other	C.peptide	785	-0.882188	0.0203456	-0.186265	0.0938883	0.223124	0.0852396	0.081434	0.0222434	7.69216e-05	0.811348	0.0221778	2.43271e-05	0.992309

## Sheet: Table S7
Supplementary Table 7. Replication of the top 25% most strongly associated amines and organic acids and other biomarkers in the discovery sample. Replication analyses were performed with paired t-tests for 189 twin pairs discordant (high-low) on aggression status. Analyzes were performed on the residuals as obtained with linear regression after regressing out sex and age at urine collection. All …
Platform	Metabolite	Low aggression		High aggression		Mean difference	df	t	p-value	FDR p-value
		mean	sd	mean	sd
Amines	L.Aspartic.acid	0.14	0.97	-0.11	1	-0.236111	188	-2.46355	0.014656	0.134034
Amines	Norepinephrine	0.11	0.84	-0.08	1.03	-0.194328	188	-2.44422	0.0154389	0.134034
Amines	L.Tryptophan	0.13	0.89	-0.04	1	-0.173745	188	-2.39653	0.0175315	0.134034
Amines	Ethanolamine	0.18	0.98	-0.03	1.06	-0.201619	188	-2.20343	0.0287795	0.134034
Amines	L.Alpha.aminobutyric.acid	0.07	0.92	-0.09	0.94	-0.155539	188	-2.19845	0.0291378	0.134034
Amines	N6.N6.N6.Trimethyl.L.lysine	0.13	0.95	-0.05	1.02	-0.174305	188	-2.08841	0.0381077	0.146079
Amines	L.Valine	0.06	0.92	-0.1	0.97	-0.148436	188	-1.9073	0.0580062	0.190592
Amines	Gamma.Glutamylglutamine	-0.08	0.89	-0.2	0.91	-0.111582	188	-1.79709	0.0739263	0.211022
Amines	L.Tyrosine	0.14	0.89	0.03	1.05	-0.124865	188	-1.70198	0.0904119	0.211022
Amines	L.Phenylalanine	0.11	0.91	-0.02	0.98	-0.128091	188	-1.69491	0.0917488	0.211022
Amines	L.Threonine	0.05	0.91	-0.08	0.98	-0.126618	188	-1.63971	0.102737	0.214814
Amines	L.2.aminoadipic.acid	0.04	0.89	-0.08	1.02	-0.111806	188	-1.44414	0.150365	0.26603
Amines	L.Arginine	0.11	0.97	0.01	1.07	-0.0911978	188	-1.05472	0.292909	0.421056
Amines	L.Methionine.sulfoxide	0.12	0.86	0.04	1.02	-0.0726117	188	-0.933266	0.35188	0.476073
Amines	Gamma.L.glutamyl.L.alanine	0.16	0.9	0.12	0.91	-0.0247955	188	-0.41302	0.680062	0.782072
Amines	O.Phosphoserine	0.12	0.88	0.1	0.87	-0.0158191	188	-0.260379	0.794857	0.794857
Organic acids	3.Hydroxyisobutyric.acid	0.09	0.99	-0.04	0.96	-0.117187	188	-1.5237	0.129265	0.247758
Organic acids	Glyceric.acid	0.03	0.9	0.12	0.97	0.088578	188	1.09454	0.275119	0.421056
Organic acids	3.methyladipic.acid	0.08	0.94	0.03	0.97	-0.045597	188	-0.555354	0.579313	0.701274
Organic acids	Succinic.acid	0.16	0.92	0.18	0.99	0.0220599	188	0.343467	0.731631	0.789371
Organic acids	Isocitrate	0.11	0.94	0.08	0.97	-0.0257209	188	-0.312442	0.755051	0.789371
Other	creatinine	0.1	0.99	0.18	0.96	0.0841501	188	1.17016	0.243419	0.399903
Other	oxDNARNA	0.03	0.98	-0.05	0.95	-0.0661706	188	-0.825805	0.409962	0.52384

## Sheet: Table S8
Supplementary Table 8. Validation of the top amines, organic acids and other biomarkers. To be included in the validation analysis, metabolites were required to have congruenet direction of effects in the discovery and replication phase. Validation analyses were performed with GEE for 183 clinical cases and 184 twin controls.Sex and age at urine collection were included in the model as covariates…
Platform	Metabolite	N	Beta				Robust SE				p-value				FDR p-value
			Intercept	aggression_case	sex_male	age at collection	Intercept	aggression_case	sex_male	age at collection	Intercept	aggression_case	sex_male	age at collection	aggression_case
Amines	Gamma.Glutamylglutamine	367	0.8654	-0.167274	-0.0637259	-0.0661673	0.356293	0.14425	0.134213	0.0353341	0.0151447	0.246209	0.634921	0.0611212	0.338301
Amines	L.Arginine	367	-0.495528	0.118743	-0.184127	0.0519799	0.309019	0.107793	0.112704	0.0294518	0.108813	0.270641	0.102318	0.077578	0.338301
Amines	Glyceric.acid	367	-0.278319	0.0946601	0.0101257	0.0234175	0.279094	0.118515	0.120145	0.0283066	0.318656	0.424453	0.932835	0.408079	0.424453
Organic acids	Succinic.acid	367	0.532162	-0.234499	-0.00257624	-0.0607615	0.347708	0.12989	0.119956	0.0353041	0.125897	0.0710159	0.982866	0.0852344	0.338301
Other	creatinine	367	-1.63185	0.163161	0.0150047	0.164328	0.306514	0.115848	0.118863	0.0296534	1.01558e-07	0.15901	0.899546	2.99712e-08	0.338301

## Sheet: Table S9
Supplementary Table 9. Sensitivity analyses for the 5 amines, organic acids and other biomarkers included in the validation phase. Sensitivity analyses were performed with paired t-tests in MZ twins discordant for aggression, after removal of the MZ twin (and co-twin) with a preexisting chronic condition or was on medication or vitamin supplements during urine collection. All p-values have been a…
Analysis	Platform	Metabolite	Low aggression		High aggression		Mean difference	df	t	p-value	FDR p-value
			mean	sd	mean	sd
No chronic condition	Amines	Gamma.Glutamylglutamine	-0.09	0.91	-0.21	0.9	-0.141007	132	-1.94343	0.0540917	0.654401
No chronic condition	Organic acids	Glyceric.acid	-0.02	0.85	0.13	0.96	0.120874	132	1.33097	0.185495	0.654401
No chronic condition	Amines	L.Arginine	0.16	1	0.1	1.06	-0.0838148	132	-0.781229	0.436066	0.745309
No chronic condition	Organic acids	Succinic.acid	0.13	0.92	0.11	0.96	-0.0333118	132	-0.460473	0.645934	0.745309
No chronic condition	Other	creatinine	0.15	0.95	0.21	0.95	0.0222459	132	0.280337	0.779658	0.779658
No medication	Amines	Gamma.Glutamylglutamine	-0.09	0.91	-0.21	0.9	-0.108426	116	-1.42296	0.157431	0.654401
No medication	Organic acids	Glyceric.acid	-0.02	0.85	0.13	0.96	0.117706	116	1.23822	0.218134	0.654401
No medication	Amines	L.Arginine	0.16	1	0.1	1.06	-0.0655026	116	-0.564026	0.573825	0.745309
No medication	Organic acids	Succinic.acid	0.13	0.92	0.11	0.96	-0.035987	116	-0.527956	0.598538	0.745309
No medication	Other	creatinine	0.15	0.95	0.21	0.95	0.0251174	116	0.330355	0.741728	0.779658
No vitamines	Amines	Glyceric.acid	-0.02	0.85	0.13	0.96	0.148824	115	1.55825	0.121921	0.654401
No vitamines	Organic acids	Gamma.Glutamylglutamine	-0.09	0.91	-0.21	0.9	-0.0808794	115	-1.03098	0.304714	0.745309
No vitamines	Amines	creatinine	0.15	0.95	0.21	0.95	0.0575785	115	0.703302	0.483289	0.745309
No vitamines	Organic acids	L.Arginine	0.16	1	0.1	1.06	-0.0773052	115	-0.647635	0.518512	0.745309
No vitamines	Other	Succinic.acid	0.13	0.92	0.11	0.96	0.0393148	115	0.528816	0.597952	0.745309

## Sheet: Table S10
Supplementary Table 10. Discovery results for the association of neurotransmitter ratios. Discovery analyses were performed with GEE for 783 twins with low or high aggression. Sex and age at urine collection were included in the model as covariates. Aggression was included as a dichotomous variable (low vs. high), with the low aggression status being the intercept. Sex was coded as a dichotomous …
neurotransmitter pathway	ratio*	N	Beta				Robust SE				p-value				FDR p-value
			Intercept	aggression_high	sex_male	age at collection	Intercept	aggression_high	sex_male	age at collection	Intercept	aggression_high	sex_male	age at collection	aggression_high
Dopamine	L-phenylalanine:L-tyrosine	783	5.83951	2.5935	2.1491	-0.698724	4.71522	1.7995	1.56589	0.55541	0.215553	0.149518	0.169925	0.20838	0.609154
Dopamine	3MT:HVA	783	1.66306	1.17083	-0.138708	-0.222479	3.02697	1.04178	1.10657	0.331135	0.582722	0.261066	0.900247	0.501668	0.609154
GABA	Glutamine:L-glutamic acid	783	9.41868	-0.980911	-0.780014	-0.725649	7.22759	2.41753	2.47753	0.681871	0.192521	0.684927	0.752886	0.287237	0.931917
GABA	GABA:succinic acid	783	0.657921	-0.29301	-1.77128	0.269383	2.34938	1.14943	1.15136	0.311458	0.779446	0.798786	0.123946	0.387089	0.931917
GABA	L-glutamic acid:GABA	783	0.371693	0.00885026	1.82009	-0.107549	2.20288	1.12446	1.12281	0.275044	0.866009	0.99372	0.105015	0.695778	0.99372
Serotonine	5HTP:serotonin	783	6.36036	3.20086	-2.68618	-0.529553	5.47797	2.69747	2.55872	0.48382	0.245609	0.23538	0.293803	0.273725	0.609154
Serotonine	L-tryptophan:5HTP	783	-8.73144	-0.719534	2.08447	0.831448	8.64394	1.94559	2.12574	0.756068	0.312437	0.711511	0.326795	0.271463	0.931917

[truncated: 10 more sheets: Table S11, Table S12, Table S13, Table S14, Table S15, Table S16, Table S17, Table S18, Table S19, Table S20]
